# Supplementary material
Source: PubMed Central journal article supplement (PMC4657143)
Supplement: NIHMS722661-supplement-01.pdf [file NIHMS722661-supplement-01.pdf]

410  
411  
412  
413  
414  
415  
416  
417  
418  
419  
420  
421

**Supplementary Table S1.** Hypothesized initiators and promoters of helminth parasite-induced malignancy.

| <sup>a</sup> Initiation/ promotion/ progression | <i>Opisthorchis viverrini</i> -induce CCA | <i>Schistosoma haematobium</i> -induced SCC | Refs                 |
|-------------------------------------------------|-------------------------------------------|---------------------------------------------|----------------------|
| Excretions/ secretions of parasites             | + <sup>b</sup>                            | +                                           | [6, 79, 80]          |
| Parasite eggs                                   | ?                                         | +                                           | [23, 25, 44]         |
| Granulin                                        | +                                         | ?                                           | [79]                 |
| Thioredoxin                                     | +                                         | ?                                           | [81]                 |
| ROS/RNS                                         | +                                         | +                                           | [23, 25, 44]         |
| Parasite associated microbiota                  | +                                         | ?                                           | [38, 39, 82]         |
| <i>Helicobacter</i>                             | +                                         | -                                           | [35-38]              |
| Catechol-estrogens                              |                                           | +                                           | [30, 48, 50, 59, 64] |
| Oxysterols                                      | +                                         | ?                                           | [29, 30]             |
| Interleukin 6                                   | +                                         | +                                           | [17, 83]             |

422  
423  
424  
425  
426

<sup>a</sup> Non-inclusive list.

<sup>b</sup> +, involved in the carcinogenesis; -, not thought to be involved in carcinogenesis; ?, unclear if plays a role in carcinogenesis
